# Supplementary material for: A solvent-reagent selection guide for Steglich-type esterification of carboxylic acids
Source: Royal Society of Chemistry journal article supplement (doi:10.1039/d1gc02251b), 2021-01-01
Supplement: d1gc02251b1.xlsx [file d1gc02251b1.xlsx]

## Sheet: EDC
	Supplementary Information: Appendix 2				Summary of First Pass Metrics Toolkit
	Yield, AE, RME, MI/PMI and OE
	Reactant (Limiting Reactant First)	Mass (g)	MW	Mol	Catalyst	Mass (g)	Reagent	Mass (g)	Reaction solvent	Volume (cm3)	Density (g ml-1)	Mass (g)	Work up chemical	Mass (g)	Workup solvent	Volume (cm3)	Density (g ml-1)	Mass (g)
	Phenylacetic Acid	27.23	136.15	0.2			DMAP	6.1	DCM	100	1.33	133						0
	Phenol	18.9	94.113	0.200822								0						0
	EDC.HCl	38.34	191.7	0.2								0						0
												0						0
				#DIV/0!								0						0
				#DIV/0!								0						0
				#DIV/0!								0						0
	Total	84.47	421.963			0		6.1				133		0				0
										Flag
								Yield	100.001	100.001
								Conversion	100	100
								Selectivity	100.001	100.001					Mass	MW	Mol
								AE	50.3001				Product		42.45	212.248	0.200002
								RME	50.2545	OE	99.9093				mass
								PMI total	5.26667				Unreacted limiting reactant		0
								PMI Reaction	5.26667
								PMI reactants, reagents, catlyst	2.13357
								PMI reaction solvents	3.1331
								PMI Workup	0
								PMI Workup chemical	0
								PMI workup solvents	0
	Solvents (First Pass)							List solvents below
	Preferred solvents		water, EtOH, nBuOH, AcOipr, AcOnBu, PhOMe, MeOH, tBuOH, BnOH, ethylene glycol, acetone, MEK, MIBK, AcOEt, sulfolane
	Problematic solvents: (acceptable only if substitution does not offer advantages)		DMSO, cyclohexanone, DMPU, AcOH, Ac2O, Acetonitrile, AcOMe, THF, heptane, Me-cyclohexane, toluene, xylene, MTBE, cyclohexane, chlorobenzene, formic acid, pyridine, Me-THF
	Hazardous solvents: These solvents have significant health and/or safety concerns.		dioxane, pentane, TEA, diisopropyl ether, DME, DCM, DMF, DMA, NMP, methoxyethanol, hexane
	Highly hazardous solvents: The solvents which are agreed not to be used, even in screening		Et2O, Benzene, CCl4, chloroform, DCE, nitromethane, CS2, HMPA
	Catalyst/enzyme (First Pass)				Tick						Tick
	Catalyst or enzyme used, or reaction takes place without any catalyst/reagents.			Green Flag			Facile recovery of catalyst/enzyme			Green Flag
	Use of stoichiometric quantities of reagents			Amber Flag			catalyst/enzyme not recovered			Amber Flag
	Use of reagents in excess			Red Flag
	Critical elements
	Supply remaining	Flag colour	Note element
	5-50 years	Red Flag
	50-500 years	Amber Flag
	+500 years	Green Flag
	Energy (First Pass)			Tick						Tick
	Reaction run between 0 to 70oC		Green Flag			Reaction run at reflux			Red Flag
	Reaction run between -20 to 0 or 70 to 140oC		Amber Flag			Reaction run 5oC or more below the solvent boiling point			Green Flag
	Reaction run below -20 or above 140oC		Red Flag
	Batch/flow			Tick		Work Up				List
	Flow	Green Flag				quenching			Green Flag
	Batch	Amber Flag				filtration
						centrifugation
						crystallisation
						Low temperature distillation/evaporation/ sublimation (< 140 oC at atmospheric pressure)
						solvent exchange, quenching into aqueous solvent			Amber Flag
						chromatography/ion exchange			Red Flag
						high temperature distillation/evaporations/sublimation (> 140 oC at atmospheric pressure)
						multiple recrystallisation
								List substances and H-codes		List substances and H-codes		List substances and H-codes
	Health & safety
		Red Flag		Amber Flag		Green Flag
	Highly explosive	H200, H201, H202, H203		H205, H220, H224		If no red or amber flagged H codes present then green flag
	Explosive thermal runaway	H230, H240, H250		H241
	Toxic	H300, H310, H330		H301, H311, H331,
	Long Term toxicity	H340, H350, H360, H370, H372		H341, H351, H361, H371, H373
	Environmental implications	H400, H410, H411, H420		H401, H412
	Use of chemicals of environmental concern					List substances of very high concern
	Chemical identified as Substances of Very High Concern by ChemSec which are utilised				Red Flag

## Sheet: DIC
	Supplementary Information: Appendix 2				Summary of First Pass Metrics Toolkit
	Yield, AE, RME, MI/PMI and OE
	Reactant (Limiting Reactant First)	Mass (g)	MW	Mol	Catalyst	Mass (g)	Reagent	Mass (g)	Reaction solvent	Volume (cm3)	Density (g ml-1)	Mass (g)	Work up chemical	Mass (g)	Workup solvent	Volume (cm3)	Density (g ml-1)	Mass (g)
	Phenylacetic Acid	27.23	136.15	0.2			DMAP	6.1	DCM	1	1.33	1.33						0
	Phenol	18.9	94.113	0.200822								0						0
	DIC	25.24	126.2	0.2								0						0
												0						0
				#DIV/0!								0						0
				#DIV/0!								0						0
				#DIV/0!								0						0
	Total	71.37	356.463			0		6.1				1.33		0				0
										Flag
								Yield	100.001	100.001
								Conversion	100	100
								Selectivity	100.001	100.001					Mass	MW	Mol
								AE	59.5428				Product		42.45	212.248	0.200002
								RME	59.4788	OE	99.8925				mass
								PMI total	1.8563				Unreacted limiting reactant		0
								PMI Reaction	1.8563
								PMI reactants, reagents, catlyst	1.82497
								PMI reaction solvents	0.031331
								PMI Workup	0
								PMI Workup chemical	0
								PMI workup solvents	0
	Solvents (First Pass)							List solvents below
	Preferred solvents		water, EtOH, nBuOH, AcOipr, AcOnBu, PhOMe, MeOH, tBuOH, BnOH, ethylene glycol, acetone, MEK, MIBK, AcOEt, sulfolane
	Problematic solvents: (acceptable only if substitution does not offer advantages)		DMSO, cyclohexanone, DMPU, AcOH, Ac2O, Acetonitrile, AcOMe, THF, heptane, Me-cyclohexane, toluene, xylene, MTBE, cyclohexane, chlorobenzene, formic acid, pyridine, Me-THF
	Hazardous solvents: These solvents have significant health and/or safety concerns.		dioxane, pentane, TEA, diisopropyl ether, DME, DCM, DMF, DMA, NMP, methoxyethanol, hexane
	Highly hazardous solvents: The solvents which are agreed not to be used, even in screening		Et2O, Benzene, CCl4, chloroform, DCE, nitromethane, CS2, HMPA
	Catalyst/enzyme (First Pass)				Tick						Tick
	Catalyst or enzyme used, or reaction takes place without any catalyst/reagents.			Green Flag			Facile recovery of catalyst/enzyme			Green Flag
	Use of stoichiometric quantities of reagents			Amber Flag			catalyst/enzyme not recovered			Amber Flag
	Use of reagents in excess			Red Flag
	Critical elements
	Supply remaining	Flag colour	Note element
	5-50 years	Red Flag
	50-500 years	Amber Flag
	+500 years	Green Flag
	Energy (First Pass)			Tick						Tick
	Reaction run between 0 to 70oC		Green Flag			Reaction run at reflux			Red Flag
	Reaction run between -20 to 0 or 70 to 140oC		Amber Flag			Reaction run 5oC or more below the solvent boiling point			Green Flag
	Reaction run below -20 or above 140oC		Red Flag
	Batch/flow			Tick		Work Up				List
	Flow	Green Flag				quenching			Green Flag
	Batch	Amber Flag				filtration
						centrifugation
						crystallisation
						Low temperature distillation/evaporation/ sublimation (< 140 oC at atmospheric pressure)
						solvent exchange, quenching into aqueous solvent			Amber Flag
						chromatography/ion exchange			Red Flag
						high temperature distillation/evaporations/sublimation (> 140 oC at atmospheric pressure)
						multiple recrystallisation
								List substances and H-codes		List substances and H-codes		List substances and H-codes
	Health & safety
		Red Flag		Amber Flag		Green Flag
	Highly explosive	H200, H201, H202, H203		H205, H220, H224		If no red or amber flagged H codes present then green flag
	Explosive thermal runaway	H230, H240, H250		H241
	Toxic	H300, H310, H330		H301, H311, H331,
	Long Term toxicity	H340, H350, H360, H370, H372		H341, H351, H361, H371, H373
	Environmental implications	H400, H410, H411, H420		H401, H412
	Use of chemicals of environmental concern					List substances of very high concern
	Chemical identified as Substances of Very High Concern by ChemSec which are utilised				Red Flag

## Sheet: DCC
	Supplementary Information: Appendix 2				Summary of First Pass Metrics Toolkit
	Yield, AE, RME, MI/PMI and OE
	Reactant (Limiting Reactant First)	Mass (g)	MW	Mol	Catalyst	Mass (g)	Reagent	Mass (g)	Reaction solvent	Volume (cm3)	Density (g ml-1)	Mass (g)	Work up chemical	Mass (g)	Workup solvent	Volume (cm3)	Density (g ml-1)	Mass (g)
	Phenylacetic Acid	27.23	136.15	0.2			DMAP	6.1	DCM	1	1.33	1.33						0
	Phenol	18.9	94.113	0.200822								0						0
	DCC	41.26	206.3	0.2								0						0
				#DIV/0!								0						0
				#DIV/0!								0						0
				#DIV/0!								0						0
				#DIV/0!								0						0
	Total	87.39	436.563			0		6.1				1.33		0				0
										Flag
								Yield	100.001	100.001
								Conversion	100	100
								Selectivity	100.001	100.001					Mass	MW	Mol
								AE	48.618				Product		42.45	212.248	0.200002
								RME	48.5754	OE	99.9124				mass
								PMI total	2.23369				Unreacted limiting reactant		0
								PMI Reaction	2.23369
								PMI reactants, reagents, catlyst	2.20236
								PMI reaction solvents	0.031331
								PMI Workup	0
								PMI Workup chemical	0
								PMI workup solvents	0
	Solvents (First Pass)							List solvents below
	Preferred solvents		water, EtOH, nBuOH, AcOipr, AcOnBu, PhOMe, MeOH, tBuOH, BnOH, ethylene glycol, acetone, MEK, MIBK, AcOEt, sulfolane
	Problematic solvents: (acceptable only if substitution does not offer advantages)		DMSO, cyclohexanone, DMPU, AcOH, Ac2O, Acetonitrile, AcOMe, THF, heptane, Me-cyclohexane, toluene, xylene, MTBE, cyclohexane, chlorobenzene, formic acid, pyridine, Me-THF
	Hazardous solvents: These solvents have significant health and/or safety concerns.		dioxane, pentane, TEA, diisopropyl ether, DME, DCM, DMF, DMA, NMP, methoxyethanol, hexane
	Highly hazardous solvents: The solvents which are agreed not to be used, even in screening		Et2O, Benzene, CCl4, chloroform, DCE, nitromethane, CS2, HMPA
	Catalyst/enzyme (First Pass)				Tick						Tick
	Catalyst or enzyme used, or reaction takes place without any catalyst/reagents.			Green Flag			Facile recovery of catalyst/enzyme			Green Flag
	Use of stoichiometric quantities of reagents			Amber Flag			catalyst/enzyme not recovered			Amber Flag
	Use of reagents in excess			Red Flag
	Critical elements
	Supply remaining	Flag colour	Note element
	5-50 years	Red Flag
	50-500 years	Amber Flag
	+500 years	Green Flag
	Energy (First Pass)			Tick						Tick
	Reaction run between 0 to 70oC		Green Flag			Reaction run at reflux			Red Flag
	Reaction run between -20 to 0 or 70 to 140oC		Amber Flag			Reaction run 5oC or more below the solvent boiling point			Green Flag
	Reaction run below -20 or above 140oC		Red Flag
	Batch/flow			Tick		Work Up				List
	Flow	Green Flag				quenching			Green Flag
	Batch	Amber Flag				filtration
						centrifugation
						crystallisation
						Low temperature distillation/evaporation/ sublimation (< 140 oC at atmospheric pressure)
						solvent exchange, quenching into aqueous solvent			Amber Flag
						chromatography/ion exchange			Red Flag
						high temperature distillation/evaporations/sublimation (> 140 oC at atmospheric pressure)
						multiple recrystallisation
								List substances and H-codes		List substances and H-codes		List substances and H-codes
	Health & safety
		Red Flag		Amber Flag		Green Flag
	Highly explosive	H200, H201, H202, H203		H205, H220, H224		If no red or amber flagged H codes present then green flag
	Explosive thermal runaway	H230, H240, H250		H241
	Toxic	H300, H310, H330		H301, H311, H331,
	Long Term toxicity	H340, H350, H360, H370, H372		H341, H351, H361, H371, H373
	Environmental implications	H400, H410, H411, H420		H401, H412
	Use of chemicals of environmental concern					List substances of very high concern
	Chemical identified as Substances of Very High Concern by ChemSec which are utilised				Red Flag

## Sheet: COMU
	Supplementary Information: Appendix 2				Summary of First Pass Metrics Toolkit
	Yield, AE, RME, MI/PMI and OE
	Reactant (Limiting Reactant First)	Mass (g)	MW	Mol	Catalyst	Mass (g)	Reagent	Mass (g)	Reaction solvent	Volume (cm3)	Density (g ml-1)	Mass (g)	Work up chemical	Mass (g)	Workup solvent	Volume (cm3)	Density (g ml-1)	Mass (g)
	Phenylacetic Acid	27.23	136.15	0.2			TEA	60.714	DCM	1	1.33	1.33						0
	Phenol	18.9	94.113	0.200822								0						0
	COMU	85.65	428.27	0.199991								0						0
												0						0
				#DIV/0!								0						0
				#DIV/0!								0						0
				#DIV/0!								0						0
	Total	131.78	658.533			0		60.714				1.33		0				0
										Flag
								Yield	100.001	100.001
								Conversion	100	100
								Selectivity	100.001	100.001					Mass	MW	Mol
								AE	32.2304				Product		42.45	212.248	0.200002
								RME	32.2128	OE	99.9452				mass
								PMI total	4.56594				Unreacted limiting reactant		0
								PMI Reaction	4.56594
								PMI reactants, reagents, catlyst	4.53461
								PMI reaction solvents	0.031331
								PMI Workup	0
								PMI Workup chemical	0
								PMI workup solvents	0
	Solvents (First Pass)							List solvents below
	Preferred solvents		water, EtOH, nBuOH, AcOipr, AcOnBu, PhOMe, MeOH, tBuOH, BnOH, ethylene glycol, acetone, MEK, MIBK, AcOEt, sulfolane
	Problematic solvents: (acceptable only if substitution does not offer advantages)		DMSO, cyclohexanone, DMPU, AcOH, Ac2O, Acetonitrile, AcOMe, THF, heptane, Me-cyclohexane, toluene, xylene, MTBE, cyclohexane, chlorobenzene, formic acid, pyridine, Me-THF
	Hazardous solvents: These solvents have significant health and/or safety concerns.		dioxane, pentane, TEA, diisopropyl ether, DME, DCM, DMF, DMA, NMP, methoxyethanol, hexane
	Highly hazardous solvents: The solvents which are agreed not to be used, even in screening		Et2O, Benzene, CCl4, chloroform, DCE, nitromethane, CS2, HMPA
	Catalyst/enzyme (First Pass)				Tick						Tick
	Catalyst or enzyme used, or reaction takes place without any catalyst/reagents.			Green Flag			Facile recovery of catalyst/enzyme			Green Flag
	Use of stoichiometric quantities of reagents			Amber Flag			catalyst/enzyme not recovered			Amber Flag
	Use of reagents in excess			Red Flag
	Critical elements
	Supply remaining	Flag colour	Note element
	5-50 years	Red Flag
	50-500 years	Amber Flag
	+500 years	Green Flag
	Energy (First Pass)			Tick						Tick
	Reaction run between 0 to 70oC		Green Flag			Reaction run at reflux			Red Flag
	Reaction run between -20 to 0 or 70 to 140oC		Amber Flag			Reaction run 5oC or more below the solvent boiling point			Green Flag
	Reaction run below -20 or above 140oC		Red Flag
	Batch/flow			Tick		Work Up				List
	Flow	Green Flag				quenching			Green Flag
	Batch	Amber Flag				filtration
						centrifugation
						crystallisation
						Low temperature distillation/evaporation/ sublimation (< 140 oC at atmospheric pressure)
						solvent exchange, quenching into aqueous solvent			Amber Flag
						chromatography/ion exchange			Red Flag
						high temperature distillation/evaporations/sublimation (> 140 oC at atmospheric pressure)
						multiple recrystallisation
								List substances and H-codes		List substances and H-codes		List substances and H-codes
	Health & safety
		Red Flag		Amber Flag		Green Flag
	Highly explosive	H200, H201, H202, H203		H205, H220, H224		If no red or amber flagged H codes present then green flag
	Explosive thermal runaway	H230, H240, H250		H241
	Toxic	H300, H310, H330		H301, H311, H331,
	Long Term toxicity	H340, H350, H360, H370, H372		H341, H351, H361, H371, H373
	Environmental implications	H400, H410, H411, H420		H401, H412
	Use of chemicals of environmental concern					List substances of very high concern
	Chemical identified as Substances of Very High Concern by ChemSec which are utilised				Red Flag

## Sheet: T3P
	Supplementary Information: Appendix 2				Summary of First Pass Metrics Toolkit
	Yield, AE, RME, MI/PMI and OE
	Reactant (Limiting Reactant First)	Mass (g)	MW	Mol	Catalyst	Mass (g)	Reagent	Mass (g)	Reaction solvent	Volume (cm3)	Density (g ml-1)	Mass (g)	Work up chemical	Mass (g)	Workup solvent	Volume (cm3)	Density (g ml-1)	Mass (g)
	Phenylacetic Acid	27.23	136.15	0.2			TEA	60.714	DCM	1	1.33	1.33						0
	Phenol	18.9	94.113	0.200822			DMAP	6.1				0						0
	T3P	63.64	318.2	0.2								0						0
												0						0
				#DIV/0!								0						0
				#DIV/0!								0						0
				#DIV/0!								0						0
	Total	109.77	548.463			0		66.814				1.33		0				0
										Flag
								Yield	100.001	100.001
								Conversion	100	100
								Selectivity	100.001	100.001					Mass	MW	Mol
								AE	38.6987				Product		42.45	212.248	0.200002
								RME	38.6718	OE	99.9304				mass
								PMI total	4.19114				Unreacted limiting reactant		0
								PMI Reaction	4.19114
								PMI reactants, reagents, catlyst	4.15981
								PMI reaction solvents	0.031331
								PMI Workup	0
								PMI Workup chemical	0
								PMI workup solvents	0
	Solvents (First Pass)							List solvents below
	Preferred solvents		water, EtOH, nBuOH, AcOipr, AcOnBu, PhOMe, MeOH, tBuOH, BnOH, ethylene glycol, acetone, MEK, MIBK, AcOEt, sulfolane
	Problematic solvents: (acceptable only if substitution does not offer advantages)		DMSO, cyclohexanone, DMPU, AcOH, Ac2O, Acetonitrile, AcOMe, THF, heptane, Me-cyclohexane, toluene, xylene, MTBE, cyclohexane, chlorobenzene, formic acid, pyridine, Me-THF
	Hazardous solvents: These solvents have significant health and/or safety concerns.		dioxane, pentane, TEA, diisopropyl ether, DME, DCM, DMF, DMA, NMP, methoxyethanol, hexane
	Highly hazardous solvents: The solvents which are agreed not to be used, even in screening		Et2O, Benzene, CCl4, chloroform, DCE, nitromethane, CS2, HMPA
	Catalyst/enzyme (First Pass)				Tick						Tick
	Catalyst or enzyme used, or reaction takes place without any catalyst/reagents.			Green Flag			Facile recovery of catalyst/enzyme			Green Flag
	Use of stoichiometric quantities of reagents			Amber Flag			catalyst/enzyme not recovered			Amber Flag
	Use of reagents in excess			Red Flag
	Critical elements
	Supply remaining	Flag colour	Note element
	5-50 years	Red Flag
	50-500 years	Amber Flag
	+500 years	Green Flag
	Energy (First Pass)			Tick						Tick
	Reaction run between 0 to 70oC		Green Flag			Reaction run at reflux			Red Flag
	Reaction run between -20 to 0 or 70 to 140oC		Amber Flag			Reaction run 5oC or more below the solvent boiling point			Green Flag
	Reaction run below -20 or above 140oC		Red Flag
	Batch/flow			Tick		Work Up				List
	Flow	Green Flag				quenching			Green Flag
	Batch	Amber Flag				filtration
						centrifugation
						crystallisation
						Low temperature distillation/evaporation/ sublimation (< 140 oC at atmospheric pressure)
						solvent exchange, quenching into aqueous solvent			Amber Flag
						chromatography/ion exchange			Red Flag
						high temperature distillation/evaporations/sublimation (> 140 oC at atmospheric pressure)
						multiple recrystallisation
								List substances and H-codes		List substances and H-codes		List substances and H-codes
	Health & safety
		Red Flag		Amber Flag		Green Flag
	Highly explosive	H200, H201, H202, H203		H205, H220, H224		If no red or amber flagged H codes present then green flag
	Explosive thermal runaway	H230, H240, H250		H241
	Toxic	H300, H310, H330		H301, H311, H331,
	Long Term toxicity	H340, H350, H360, H370, H372		H341, H351, H361, H371, H373
	Environmental implications	H400, H410, H411, H420		H401, H412
	Use of chemicals of environmental concern					List substances of very high concern
	Chemical identified as Substances of Very High Concern by ChemSec which are utilised				Red Flag

## Sheet: CDI
	Supplementary Information: Appendix 2				Summary of First Pass Metrics Toolkit
	Yield, AE, RME, MI/PMI and OE
	Reactant (Limiting Reactant First)	Mass (g)	MW	Mol	Catalyst	Mass (g)	Reagent	Mass (g)	Reaction solvent	Volume (cm3)	Density (g ml-1)	Mass (g)	Work up chemical	Mass (g)	Workup solvent	Volume (cm3)	Density (g ml-1)	Mass (g)
	Phenylacetic Acid	27.23	136.15	0.2					DCM	1	1.33	1.33						0
	Phenol	18.9	94.113	0.200822								0						0
	CDI	32.43	162.15	0.2								0						0
												0						0
				#DIV/0!								0						0
				#DIV/0!								0						0
				#DIV/0!								0						0
	Total	78.56	392.413			0		0				1.33		0				0
										Flag
								Yield	100.001	100.001
								Conversion	100	100
								Selectivity	100.001	100.001					Mass	MW	Mol
								AE	54.0879				Product		42.45	212.248	0.200002
								RME	54.0351	OE	99.9024				mass
								PMI total	1.88198				Unreacted limiting reactant		0
								PMI Reaction	1.88198
								PMI reactants, reagents, catlyst	1.85065
								PMI reaction solvents	0.031331
								PMI Workup	0
								PMI Workup chemical	0
								PMI workup solvents	0
	Solvents (First Pass)							List solvents below
	Preferred solvents		water, EtOH, nBuOH, AcOipr, AcOnBu, PhOMe, MeOH, tBuOH, BnOH, ethylene glycol, acetone, MEK, MIBK, AcOEt, sulfolane
	Problematic solvents: (acceptable only if substitution does not offer advantages)		DMSO, cyclohexanone, DMPU, AcOH, Ac2O, Acetonitrile, AcOMe, THF, heptane, Me-cyclohexane, toluene, xylene, MTBE, cyclohexane, chlorobenzene, formic acid, pyridine, Me-THF
	Hazardous solvents: These solvents have significant health and/or safety concerns.		dioxane, pentane, TEA, diisopropyl ether, DME, DCM, DMF, DMA, NMP, methoxyethanol, hexane
	Highly hazardous solvents: The solvents which are agreed not to be used, even in screening		Et2O, Benzene, CCl4, chloroform, DCE, nitromethane, CS2, HMPA
	Catalyst/enzyme (First Pass)				Tick						Tick
	Catalyst or enzyme used, or reaction takes place without any catalyst/reagents.			Green Flag			Facile recovery of catalyst/enzyme			Green Flag
	Use of stoichiometric quantities of reagents			Amber Flag			catalyst/enzyme not recovered			Amber Flag
	Use of reagents in excess			Red Flag
	Critical elements
	Supply remaining	Flag colour	Note element
	5-50 years	Red Flag
	50-500 years	Amber Flag
	+500 years	Green Flag
	Energy (First Pass)			Tick						Tick
	Reaction run between 0 to 70oC		Green Flag			Reaction run at reflux			Red Flag
	Reaction run between -20 to 0 or 70 to 140oC		Amber Flag			Reaction run 5oC or more below the solvent boiling point			Green Flag
	Reaction run below -20 or above 140oC		Red Flag
	Batch/flow			Tick		Work Up				List
	Flow	Green Flag				quenching			Green Flag
	Batch	Amber Flag				filtration
						centrifugation
						crystallisation
						Low temperature distillation/evaporation/ sublimation (< 140 oC at atmospheric pressure)
						solvent exchange, quenching into aqueous solvent			Amber Flag
						chromatography/ion exchange			Red Flag
						high temperature distillation/evaporations/sublimation (> 140 oC at atmospheric pressure)
						multiple recrystallisation
								List substances and H-codes		List substances and H-codes		List substances and H-codes
	Health & safety
		Red Flag		Amber Flag		Green Flag
	Highly explosive	H200, H201, H202, H203		H205, H220, H224		If no red or amber flagged H codes present then green flag
	Explosive thermal runaway	H230, H240, H250		H241
	Toxic	H300, H310, H330		H301, H311, H331,
	Long Term toxicity	H340, H350, H360, H370, H372		H341, H351, H361, H371, H373
	Environmental implications	H400, H410, H411, H420		H401, H412
	Use of chemicals of environmental concern					List substances of very high concern
	Chemical identified as Substances of Very High Concern by ChemSec which are utilised				Red Flag

## Sheet: Mukaiyama
	Supplementary Information: Appendix 2				Summary of First Pass Metrics Toolkit
	Yield, AE, RME, MI/PMI and OE
	Reactant (Limiting Reactant First)	Mass (g)	MW	Mol	Catalyst	Mass (g)	Reagent	Mass (g)	Reaction solvent	Volume (cm3)	Density (g ml-1)	Mass (g)	Work up chemical	Mass (g)	Workup solvent	Volume (cm3)	Density (g ml-1)	Mass (g)
	Phenylacetic Acid	27.23	136.15	0.2			TEA	60.714	DCM	1	1.33	1.33						0
	Phenol	18.9	94.113	0.200822								0						0
	Mukaiyama	51.098	255.49	0.2								0						0
												0						0
				#DIV/0!								0						0
				#DIV/0!								0						0
				#DIV/0!								0						0
	Total	97.228	485.753			0		60.714				1.33		0				0
										Flag
								Yield	100.001	100.001
								Conversion	100	100
								Selectivity	100.001	100.001					Mass	MW	Mol
								AE	43.6946				Product		42.45	212.248	0.200002
								RME	43.6603	OE	99.9213				mass
								PMI total	3.75199				Unreacted limiting reactant		0
								PMI Reaction	3.75199
								PMI reactants, reagents, catlyst	3.72066
								PMI reaction solvents	0.031331
								PMI Workup	0
								PMI Workup chemical	0
								PMI workup solvents	0
	Solvents (First Pass)							List solvents below
	Preferred solvents		water, EtOH, nBuOH, AcOipr, AcOnBu, PhOMe, MeOH, tBuOH, BnOH, ethylene glycol, acetone, MEK, MIBK, AcOEt, sulfolane
	Problematic solvents: (acceptable only if substitution does not offer advantages)		DMSO, cyclohexanone, DMPU, AcOH, Ac2O, Acetonitrile, AcOMe, THF, heptane, Me-cyclohexane, toluene, xylene, MTBE, cyclohexane, chlorobenzene, formic acid, pyridine, Me-THF
	Hazardous solvents: These solvents have significant health and/or safety concerns.		dioxane, pentane, TEA, diisopropyl ether, DME, DCM, DMF, DMA, NMP, methoxyethanol, hexane
	Highly hazardous solvents: The solvents which are agreed not to be used, even in screening		Et2O, Benzene, CCl4, chloroform, DCE, nitromethane, CS2, HMPA
		7
	Catalyst/enzyme (First Pass)				Tick						Tick
	Catalyst or enzyme used, or reaction takes place without any catalyst/reagents.			Green Flag			Facile recovery of catalyst/enzyme			Green Flag
	Use of stoichiometric quantities of reagents			Amber Flag			catalyst/enzyme not recovered			Amber Flag
	Use of reagents in excess			Red Flag
	Critical elements
	Supply remaining	Flag colour	Note element
	5-50 years	Red Flag
	50-500 years	Amber Flag
	+500 years	Green Flag
	Energy (First Pass)			Tick						Tick
	Reaction run between 0 to 70oC		Green Flag			Reaction run at reflux			Red Flag
	Reaction run between -20 to 0 or 70 to 140oC		Amber Flag			Reaction run 5oC or more below the solvent boiling point			Green Flag
	Reaction run below -20 or above 140oC		Red Flag
	Batch/flow			Tick		Work Up				List
	Flow	Green Flag				quenching			Green Flag
	Batch	Amber Flag				filtration
						centrifugation
						crystallisation
						Low temperature distillation/evaporation/ sublimation (< 140 oC at atmospheric pressure)
						solvent exchange, quenching into aqueous solvent			Amber Flag
						chromatography/ion exchange			Red Flag
						high temperature distillation/evaporations/sublimation (> 140 oC at atmospheric pressure)
						multiple recrystallisation
								List substances and H-codes		List substances and H-codes		List substances and H-codes
	Health & safety
		Red Flag		Amber Flag		Green Flag
	Highly explosive	H200, H201, H202, H203		H205, H220, H224		If no red or amber flagged H codes present then green flag
	Explosive thermal runaway	H230, H240, H250		H241
	Toxic	H300, H310, H330		H301, H311, H331,
	Long Term toxicity	H340, H350, H360, H370, H372		H341, H351, H361, H371, H373
	Environmental implications	H400, H410, H411, H420		H401, H412
	Use of chemicals of environmental concern					List substances of very high concern
	Chemical identified as Substances of Very High Concern by ChemSec which are utilised				Red Flag

## Sheet: Phenyl 2-phenylacetate (1)
	Supplementary Information: Appendix 2				Summary of First Pass Metrics Toolkit
	Yield, AE, RME, MI/PMI and OE
	Reactant (Limiting Reactant First)	Mass (g)	MW	mMol	Catalyst	Mass (g)	Reagent	Mass (g)	Reaction solvent	Volume (cm3)	Density (g ml-1)	Mass (g)	Work up chemical	Mass (g)	Workup solvent	Volume (cm3)	Density (g ml-1)	Mass (g)
	Phenylacetic Acid	0.272	136.15	1.9978			2,6-lutidine	0.514	DMC	4	1.07	4.28			ethyl acetate	6	0.894	5.364
	Phenol	0.188	94.11	1.99766								0			cyclohexane	138	0.78	107.64
	Muk	0.54	255.48	2.11367								0						0
												0						0
												0						0
												0						0
												0						0
	Total	1	485.74			0		0.514				4.28		0				113.004
										Flag
								Yield	91.9741	91.9741
								Conversion	100	100
								Selectivity	91.9741	91.9741					Mass	MW	mMol
								AE	43.6962				Product		0.39	212.25	1.83746
								RME	39	OE	89.2526				mass
								PMI total	304.61				Unreacted limiting reactant		0
								PMI Reaction	14.8564
								PMI reactants, reagents, catlyst	3.88205
								PMI reaction solvents	10.9744
								PMI Workup	289.754
	E-factor = mass of waste / mass of product							PMI Workup chemical	0
								PMI workup solvents	289.754
								E-Factor	303.61
	Solvents (First Pass)							List solvents below
	Preferred solvents		water, EtOH, nBuOH, AcOipr, AcOnBu, PhOMe, MeOH, tBuOH, BnOH, ethylene glycol, acetone, MEK, MIBK, AcOEt, sulfolane
	Problematic solvents: (acceptable only if substitution does not offer advantages)		DMSO, cyclohexanone, DMPU, AcOH, Ac2O, Acetonitrile, AcOMe, THF, heptane, Me-cyclohexane, toluene, xylene, MTBE, cyclohexane, chlorobenzene, formic acid, pyridine, Me-THF
	Hazardous solvents: These solvents have significant health and/or safety concerns.		dioxane, pentane, TEA, diisopropyl ether, DME, DCM, DMF, DMA, NMP, methoxyethanol, hexane
	Highly hazardous solvents: The solvents which are agreed not to be used, even in screening		Et2O, Benzene, CCl4, chloroform, DCE, nitromethane, CS2, HMPA
	Catalyst/enzyme (First Pass)				Tick						Tick
	Catalyst or enzyme used, or reaction takes place without any catalyst/reagents.			Green Flag			Facile recovery of catalyst/enzyme			Green Flag
	Use of stoichiometric quantities of reagents			Amber Flag			catalyst/enzyme not recovered			Amber Flag
	Use of reagents in excess			Red Flag
	Critical elements
	Supply remaining	Flag colour	Note element
	5-50 years	Red Flag
	50-500 years	Amber Flag
	+500 years	Green Flag
	Energy (First Pass)			Tick						Tick
	Reaction run between 0 to 70oC		Green Flag			Reaction run at reflux			Red Flag
	Reaction run between -20 to 0 or 70 to 140oC		Amber Flag			Reaction run 5oC or more below the solvent boiling point			Green Flag
	Reaction run below -20 or above 140oC		Red Flag
	Batch/flow			Tick		Work Up				List
	Flow	Green Flag				quenching			Green Flag
	Batch	Amber Flag				filtration
						centrifugation
						crystallisation
						Low temperature distillation/evaporation/ sublimation (< 140 oC at atmospheric pressure)
						solvent exchange, quenching into aqueous solvent			Amber Flag
						chromatography/ion exchange			Red Flag
						high temperature distillation/evaporations/sublimation (> 140 oC at atmospheric pressure)
						multiple recrystallisation
								List substances and H-codes		List substances and H-codes		List substances and H-codes
	Health & safety
		Red Flag		Amber Flag		Green Flag
	Highly explosive	H200, H201, H202, H203		H205, H220, H224		If no red or amber flagged H codes present then green flag
	Explosive thermal runaway	H230, H240, H250		H241
	Toxic	H300, H310, H330		H301, H311, H331,
	Long Term toxicity	H340, H350, H360, H370, H372		H341, H351, H361, H371, H373
	Environmental implications	H400, H410, H411, H420		H401, H412
	Use of chemicals of environmental concern					List substances of very high concern
	Chemical identified as Substances of Very High Concern by ChemSec which are utilised				Red Flag

## Sheet: Benzyl phenylacetate (3)
	Supplementary Information: Appendix 2				Summary of First Pass Metrics Toolkit
	Yield, AE, RME, MI/PMI and OE
	Reactant (Limiting Reactant First)	Mass (g)	MW	mMol	Catalyst	Mass (g)	Reagent	Mass (g)	Reaction solvent	Volume (cm3)	Density (g ml-1)	Mass (g)	Work up chemical	Mass (g)	Workup solvent	Volume (cm3)	Density (g ml-1)	Mass (g)
	Phenylacetic Acid	0.272	136.15	1.9978			2,6-lutidine	0.514	DMC	4	1.07	4.28			ethyl acetate	6	0.894	5.364
	Benzyl alcohol	0.216	108.14	1.99741								0			cyclohexane	138	0.78	107.64
	Muk	0.54	255.48	2.11367								0						0
												0						0
												0						0
												0						0
												0						0
	Total	1.028	499.77			0		0.514				4.28		0				113.004
										Flag
								Yield	74.9898	74.9898
								Conversion	100	100
								Selectivity	74.9898	74.9898					Mass	MW	mMol
								AE	45.2768				Product		0.339	226.28	1.49814
								RME	32.9767	OE	72.8334				mass
								PMI total	350.519				Unreacted limiting reactant		0
								PMI Reaction	17.174
								PMI reactants, reagents, catlyst	4.54867
								PMI reaction solvents	12.6254
								PMI Workup	333.345
	E-factor = mass of waste / mass of product							PMI Workup chemical	0
								PMI workup solvents	333.345
								E-Factor	349.519
	Solvents (First Pass)							List solvents below
	Preferred solvents		water, EtOH, nBuOH, AcOipr, AcOnBu, PhOMe, MeOH, tBuOH, BnOH, ethylene glycol, acetone, MEK, MIBK, AcOEt, sulfolane
	Problematic solvents: (acceptable only if substitution does not offer advantages)		DMSO, cyclohexanone, DMPU, AcOH, Ac2O, Acetonitrile, AcOMe, THF, heptane, Me-cyclohexane, toluene, xylene, MTBE, cyclohexane, chlorobenzene, formic acid, pyridine, Me-THF
	Hazardous solvents: These solvents have significant health and/or safety concerns.		dioxane, pentane, TEA, diisopropyl ether, DME, DCM, DMF, DMA, NMP, methoxyethanol, hexane
	Highly hazardous solvents: The solvents which are agreed not to be used, even in screening		Et2O, Benzene, CCl4, chloroform, DCE, nitromethane, CS2, HMPA
	Catalyst/enzyme (First Pass)				Tick						Tick
	Catalyst or enzyme used, or reaction takes place without any catalyst/reagents.			Green Flag			Facile recovery of catalyst/enzyme			Green Flag
	Use of stoichiometric quantities of reagents			Amber Flag			catalyst/enzyme not recovered			Amber Flag
	Use of reagents in excess			Red Flag
	Critical elements
	Supply remaining	Flag colour	Note element
	5-50 years	Red Flag
	50-500 years	Amber Flag
	+500 years	Green Flag
	Energy (First Pass)			Tick						Tick
	Reaction run between 0 to 70oC		Green Flag			Reaction run at reflux			Red Flag
	Reaction run between -20 to 0 or 70 to 140oC		Amber Flag			Reaction run 5oC or more below the solvent boiling point			Green Flag
	Reaction run below -20 or above 140oC		Red Flag
	Batch/flow			Tick		Work Up				List
	Flow	Green Flag				quenching			Green Flag
	Batch	Amber Flag				filtration
						centrifugation
						crystallisation
						Low temperature distillation/evaporation/ sublimation (< 140 oC at atmospheric pressure)
						solvent exchange, quenching into aqueous solvent			Amber Flag
						chromatography/ion exchange			Red Flag
						high temperature distillation/evaporations/sublimation (> 140 oC at atmospheric pressure)
						multiple recrystallisation
								List substances and H-codes		List substances and H-codes		List substances and H-codes
	Health & safety
		Red Flag		Amber Flag		Green Flag
	Highly explosive	H200, H201, H202, H203		H205, H220, H224		If no red or amber flagged H codes present then green flag
	Explosive thermal runaway	H230, H240, H250		H241
	Toxic	H300, H310, H330		H301, H311, H331,
	Long Term toxicity	H340, H350, H360, H370, H372		H341, H351, H361, H371, H373
	Environmental implications	H400, H410, H411, H420		H401, H412
	Use of chemicals of environmental concern					List substances of very high concern
	Chemical identified as Substances of Very High Concern by ChemSec which are utilised				Red Flag

## Sheet: Benzyl benzoate (4)
	Supplementary Information: Appendix 2				Summary of First Pass Metrics Toolkit
	Yield, AE, RME, MI/PMI and OE
	Reactant (Limiting Reactant First)	Mass (g)	MW	mMol	Catalyst	Mass (g)	Reagent	Mass (g)	Reaction solvent	Volume (cm3)	Density (g ml-1)	Mass (g)	Work up chemical	Mass (g)	Workup solvent	Volume (cm3)	Density (g ml-1)	Mass (g)
	Benzoic Acid	0.244	122.12	1.99803			2,6-lutidine	0.514	DMC	4	1.07	4.28			ethyl acetate	6	0.894	5.364
	Benzyl alcohol	0.216	108.14	1.99741								0			cyclohexane	138	0.78	107.64
	Muk	0.54	255.48	2.11367								0						0
												0						0
												0						0
												0						0
												0						0
	Total	1	485.74			0		0.514				4.28		0				113.004
										Flag
								Yield	74.9853	74.9853
								Conversion	100	100
								Selectivity	74.9853	74.9853					Mass	MW	mMol
								AE	43.6962				Product		0.318	212.25	1.49823
								RME	31.8	OE	72.7752				mass
								PMI total	373.579				Unreacted limiting reactant		0
								PMI Reaction	18.2201
								PMI reactants, reagents, catlyst	4.76101
								PMI reaction solvents	13.4591
								PMI Workup	355.358
	E-factor = mass of waste / mass of product							PMI Workup chemical	0
								PMI workup solvents	355.358
								E-Factor	372.579
	Solvents (First Pass)							List solvents below
	Preferred solvents		water, EtOH, nBuOH, AcOipr, AcOnBu, PhOMe, MeOH, tBuOH, BnOH, ethylene glycol, acetone, MEK, MIBK, AcOEt, sulfolane
	Problematic solvents: (acceptable only if substitution does not offer advantages)		DMSO, cyclohexanone, DMPU, AcOH, Ac2O, Acetonitrile, AcOMe, THF, heptane, Me-cyclohexane, toluene, xylene, MTBE, cyclohexane, chlorobenzene, formic acid, pyridine, Me-THF
	Hazardous solvents: These solvents have significant health and/or safety concerns.		dioxane, pentane, TEA, diisopropyl ether, DME, DCM, DMF, DMA, NMP, methoxyethanol, hexane
	Highly hazardous solvents: The solvents which are agreed not to be used, even in screening		Et2O, Benzene, CCl4, chloroform, DCE, nitromethane, CS2, HMPA
	Catalyst/enzyme (First Pass)				Tick						Tick
	Catalyst or enzyme used, or reaction takes place without any catalyst/reagents.			Green Flag			Facile recovery of catalyst/enzyme			Green Flag
	Use of stoichiometric quantities of reagents			Amber Flag			catalyst/enzyme not recovered			Amber Flag
	Use of reagents in excess			Red Flag
	Critical elements
	Supply remaining	Flag colour	Note element
	5-50 years	Red Flag
	50-500 years	Amber Flag
	+500 years	Green Flag
	Energy (First Pass)			Tick						Tick
	Reaction run between 0 to 70oC		Green Flag			Reaction run at reflux			Red Flag
	Reaction run between -20 to 0 or 70 to 140oC		Amber Flag			Reaction run 5oC or more below the solvent boiling point			Green Flag
	Reaction run below -20 or above 140oC		Red Flag
	Batch/flow			Tick		Work Up				List
	Flow	Green Flag				quenching			Green Flag
	Batch	Amber Flag				filtration
						centrifugation
						crystallisation
						Low temperature distillation/evaporation/ sublimation (< 140 oC at atmospheric pressure)
						solvent exchange, quenching into aqueous solvent			Amber Flag
						chromatography/ion exchange			Red Flag
						high temperature distillation/evaporations/sublimation (> 140 oC at atmospheric pressure)
						multiple recrystallisation
								List substances and H-codes		List substances and H-codes		List substances and H-codes
	Health & safety
		Red Flag		Amber Flag		Green Flag
	Highly explosive	H200, H201, H202, H203		H205, H220, H224		If no red or amber flagged H codes present then green flag
	Explosive thermal runaway	H230, H240, H250		H241
	Toxic	H300, H310, H330		H301, H311, H331,
	Long Term toxicity	H340, H350, H360, H370, H372		H341, H351, H361, H371, H373
	Environmental implications	H400, H410, H411, H420		H401, H412
	Use of chemicals of environmental concern					List substances of very high concern
	Chemical identified as Substances of Very High Concern by ChemSec which are utilised				Red Flag

[truncated: 15 more sheets: Methyl benzoate (7), Methyl phenylacetate (8), Isopropyl 2-phenylacetate (9), tert-Butyl 2-phenylacetate (10), 1-(4-bromophenyl)ethyl (11), Cyclohexyl 2-phenylacetate (12), Decan-2-yl 2-phenylacetat (13), Dec-2-yn-1-yl 2-phenylacet (14), 2-oxo-2-phenylethyl 2-phen (15), Benzyl pivalate (16), Benzyl 1-carbamoylcyclopro (17), Benzyl picolinate (18), Benzyl 1H-pyrrolo (19), Cholesteryl tetradecanoate (21), Cholesteryl benzoate (22)]
